# Supplementary material
Source: publisher figshare collection journal article supplement (https://karger.figshare.com/ndownloader/files/30609093)
Supplement: Supplementary file 1 [file 30609093]

| Table S1. Biomarkers values at initial consultation according to the final AKI etiology | | | | | | |
| --- | --- | --- | --- | --- | --- | --- |
| AKI Etiology | **n** | **FENa**, % | **FEUrea**, % | **uNGAL**, ng/mL | **uNGAL/Creat**, ng/mg | **pNGAL,** ng/mL |
| *Functional AKI:* | | | | | | |
| Hypovolemic azotemia | 17 | 0.77 (0.30-2.50) | 47.9 (22.5-49.2) | 61 (33-1085) | 1.2 (0.4-8.7) | 264 (109-386) |
| Cardiorenal syndrome | 2 | 2.64 (1.55-2.64) | 50.2 (50.2-50.2) | 158 (36-158) | 3.8 (0.9-3.9) | 239 (239-239) |
| Hepatorenal syndrome | 2 | 0.34 (0.27-0.34) | 33.9 (28.2-33.9) | 50 (25-50) | 0.5 (0.3-0.5) | 99 (98-99) |
| *Intrinsic AKI:* | | | | | | |
| Toxic ATN | 11 | 1.76 (1.18-4.36) | 50.8 (31.4-62.6) | 243 (151-1320) | 11.5 (3.1-25.4) | 293 (165-791) |
| Ischemic ATN | 16 | 1.76 (0.77-3.77) | 44.2 (12.6-61.8) | 1264 (592-1349) | 16.4 (12.8-29.4) | 791 (448-1545) |
| GN | 4 | 3.06 (1.04-6.11) | 64.8 (64.8-64.8) | 178 (25-178) | 2.7 (0.7-2.7) | 688 (487-688) |
| *ATN: Acute tubular necrosis, GN: Glomerular disease.* | | | | | | |
